# Supplementary material
Source: PubMed Central journal article supplement (PMC2593682)
Supplement: pp.108.126946_1.pdf [file pp.108.126946_1.pdf]

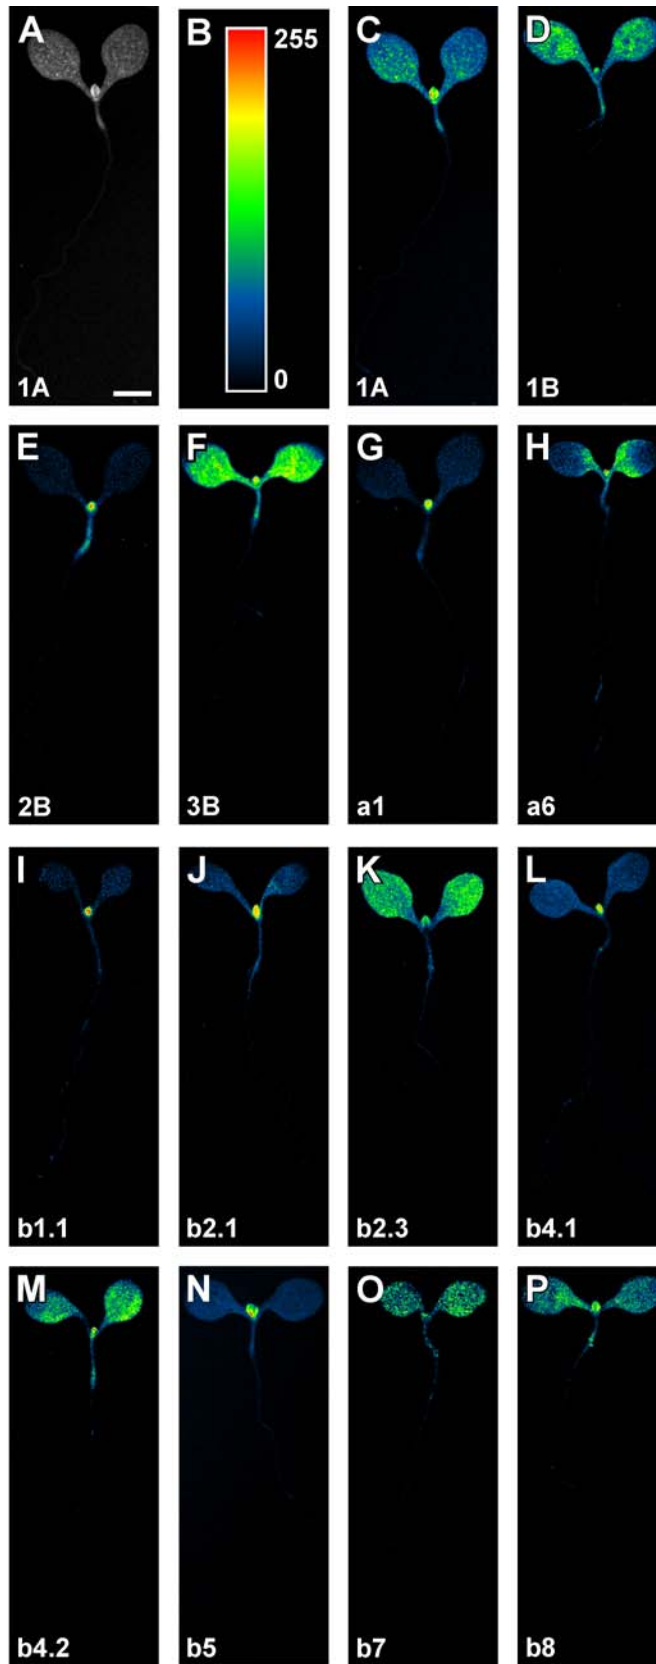

**Supplemental Figure S1.** *RbcS* and *Lhc* expression in light-grown seedlings. Lower left: gene identity. Seedlings are displayed at identical magnification; therefore, for simplicity, a scale bar is only reported in the first image. A,C-P, Wide-field epifluorescence microscopy. A-C, A look-up-table - in which black was used to encode global background, blue to encode local background, and cyan, green, yellow, orange and red to encode increasing signal intensities (B) - was applied to eight-bit gray-scaled images (A) to generate color-coded images (C). For additional details, see text. 1A, *RbcS1A*; 1B, *RbcS1B*; 2B, *RbcS2B*; 3B, *RbcS3B*; a1, *Lhca1*; a6, *Lhca6*; b1.1, *Lhcb1.1*; b2.1, *Lhcb2.1*; b2.3, *Lhcb2.3*; b4.1, *Lhcb4.1*; b4.2, *Lhcb4.2*; b5, *Lhcb5*; b7, *Lhcb7*; b8, *Lhcb8*. Bar: 500  $\mu\text{m}$ .
