# Supplementary material
Source: PubMed Central journal article supplement (PMC2593682)
Supplement: pp.108.126946_10.pdf [file pp.108.126946_10.pdf]

## Supplemental Table S2. Reproducibility criteria and indices

Figure 1

| Line    | Whole-seedling expression                                                 |
|---------|---------------------------------------------------------------------------|
| 1A-7    | Highest in leaves, intermediate in cotyledons, lowest in hypocotyls (5/5) |
| 1A-10   | Highest in leaves, intermediate in cotyledons, lowest in hypocotyls (5/5) |
| 1A-18   | Highest in leaves, intermediate in cotyledons, lowest in hypocotyls (5/5) |
| 1B-3    | Equal levels in leaves, cotyledons, hypocotyls (5/5)                      |
| 1B-17   | Equal levels in leaves, cotyledons, hypocotyls (5/5)                      |
| 1B-18   | Equal levels in leaves, cotyledons, hypocotyls (5/5)                      |
| 2B-6    | Highest in leaves, intermediate in hypocotyls, lowest in cotyledons (5/5) |
| 2B-24   | Highest in leaves, intermediate in hypocotyls, lowest in cotyledons (4/5) |
| 2B-32   | Highest in leaves, intermediate in hypocotyls, lowest in cotyledons (5/5) |
| 3B-14   | Highest in cotyledons and leaves, lowest in hypocotyls (5/5)              |
| 3B-26   | Highest in cotyledons and leaves, lowest in hypocotyls (5/5)              |
| 3B-29   | Highest in cotyledons and leaves, lowest in hypocotyls (5/5)              |
| a1-8    | Highest in leaves, lowest in cotyledons and hypocotyls (5/5)              |
| a1-9    | Highest in leaves, lowest in cotyledons and hypocotyls (5/5)              |
| a1-11   | Highest in leaves, lowest in cotyledons and hypocotyls (5/5)              |
| a6-1    | Highest in leaves, intermediate in cotyledons, lowest in hypocotyls (5/5) |
| a6-6    | Highest in leaves, intermediate in cotyledons, lowest in hypocotyls (4/5) |
| a6-13   | Highest in leaves, intermediate in cotyledons, lowest in hypocotyls (5/5) |
| b1.1-1  | Highest in leaves, lowest in cotyledons and hypocotyls (5/5)              |
| b1.1-8  | Highest in leaves, lowest in cotyledons and hypocotyls (5/5)              |
| b1.1-11 | Highest in leaves, lowest in cotyledons and hypocotyls (5/5)              |
| b2.1-6  | Highest in leaves, lowest in cotyledons and hypocotyls (5/5)              |
| b2.1-8  | Highest in leaves, lowest in cotyledons and hypocotyls (5/5)              |
| b2.1-14 | Highest in leaves, lowest in cotyledons and hypocotyls (5/5)              |
| b2.3-2  | Highest in cotyledons, intermediate in leaves, lowest in hypocotyls (5/5) |
| b2.3-5  | Highest in cotyledons, intermediate in leaves, lowest in hypocotyls (5/5) |
| b2.3-7  | Highest in cotyledons, intermediate in leaves, lowest in hypocotyls (5/5) |
| b4.1-4  | Highest in leaves, lowest in cotyledons and hypocotyls (5/5)              |
| b4.1-14 | Highest in leaves, lowest in cotyledons and hypocotyls (5/5)              |
| b4.1-15 | Highest in leaves, lowest in cotyledons and hypocotyls (5/5)              |
| b4.2-3  | Highest in cotyledons and leaves, lowest in hypocotyls (5/5)              |
| b4.2-8  | Highest in cotyledons and leaves, lowest in hypocotyls (5/5)              |
| b4.2-15 | Highest in cotyledons and leaves, lowest in hypocotyls (5/5)              |
| b5-4    | Highest in leaves, lowest in cotyledons and hypocotyls (5/5)              |
| b5-5    | Highest in leaves, lowest in cotyledons and hypocotyls (5/5)              |
| b5-13   | Highest in leaves, lowest in cotyledons and hypocotyls (5/5)              |
| b7-9    | Highest in cotyledons and leaves, lowest in hypocotyls (4/5)              |
| b7-10   | Highest in cotyledons and leaves, lowest in hypocotyls (4/5)              |
| b7-14   | Highest in cotyledons and leaves, lowest in hypocotyls (4/5)              |
| b8-3    | Highest in leaves, intermediate in cotyledons, lowest in hypocotyls (5/5) |

b8-4 Highest in leaves, intermediate in cotyledons, lowest in hypocotyls (5/5)  
 b8-7 Highest in leaves, intermediate in cotyledons, lowest in hypocotyls (5/5)

*Figure 2*

| Line    | Cotyledon expression                    | Hypocotyl expression | Root tip expression                 |
|---------|-----------------------------------------|----------------------|-------------------------------------|
| 1A-7    | Biased towards the basal region (8/10)  | Uniform (5/5)        | Vascular and endodermal cells (5/5) |
| 1A-10   | Biased towards the basal region (5/5)   | Uniform (5/5)        | Vascular and endodermal cells (5/5) |
| 1A-18   | Biased towards the basal region (4/5)   | Uniform (5/5)        | Vascular and endodermal cells (5/5) |
| 1B-3    | Uniform (5/5)                           | Uniform (5/5)        | Absent (5/5)                        |
| 1B-17   | Uniform (5/5)                           | Uniform (5/5)        | Absent (5/5)                        |
| 1B-18   | Uniform (3/5)                           | Uniform (5/5)        | Absent (5/5)                        |
| 2B-6    | Biased towards the basal region (5/5)   | Uniform (5/5)        | Absent (5/5)                        |
| 2B-24   | Biased towards the basal region (8/10)  | Uniform (5/5)        | Absent (5/5)                        |
| 2B-32   | Biased towards the basal region (4/5)   | Uniform (5/5)        | Absent (5/5)                        |
| 3B-14   | Uniform (5/5)                           | Uniform (5/5)        | Absent (5/5)                        |
| 3B-26   | Uniform (5/5)                           | Uniform (5/5)        | Absent (5/5)                        |
| 3B-29   | Uniform (4/5)                           | Uniform (5/5)        | Absent (5/5)                        |
| a1-8    | Biased towards the basal region (4/5)   | Uniform (5/5)        | Absent (5/5)                        |
| a1-9    | Biased towards the basal region (5/5)   | Uniform (5/5)        | Absent (5/5)                        |
| a1-11   | Biased towards the basal region (5/5)   | Uniform (5/5)        | Absent (5/5)                        |
| a6-1    | Biased towards the basal region (8/8)   | Uniform (5/5)        | Absent (5/5)                        |
| a6-6    | Biased towards the basal region (7/11)  | Uniform (6/6)        | Absent (6/6)                        |
| a6-13   | Biased towards the basal region (6/6)   | Uniform (6/6)        | Absent (5/5)                        |
| b1.1-1  | Biased towards the basal region (5/5)   | Uniform (5/5)        | Vascular cells (5/5)                |
| b1.1-8  | Biased towards the basal region (5/5)   | Uniform (5/5)        | Vascular cells (5/5)                |
| b1.1-11 | Biased towards the basal region (5/5)   | Uniform (5/5)        | Vascular cells (5/5)                |
| b2.1-6  | Scattered (5/5)                         | Uniform (5/5)        | Absent (5/5)                        |
| b2.1-8  | Scattered (5/5)                         | Uniform (5/5)        | Absent (5/5)                        |
| b2.1-14 | Scattered (5/5)                         | Uniform (5/5)        | Absent (5/5)                        |
| b2.3-2  | Scattered (5/5)                         | Uniform (4/5)        | Absent (5/5)                        |
| b2.3-5  | Scattered (5/5)                         | Uniform (5/5)        | Absent (5/5)                        |
| b2.3-7  | Scattered (5/5)                         | Uniform (5/5)        | Absent (5/5)                        |
| b4.1-4  | Scattered (5/5)                         | Uniform (5/5)        | Endodermal cells (5/5)              |
| b4.1-14 | Scattered (5/5)                         | Uniform (5/5)        | Endodermal cells (5/5)              |
| b4.1-15 | Scattered (5/5)                         | Uniform (5/5)        | Endodermal cells (5/5)              |
| b4.2-3  | Biased towards the basal region (5/5)   | Uniform (5/5)        | Absent (5/5)                        |
| b4.2-8  | Biased towards the basal region (5/5)   | Uniform (4/5)        | Absent (5/5)                        |
| b4.2-15 | Biased towards the basal region (5/5)   | Uniform (5/5)        | Absent (5/5)                        |
| b5-4    | Biased towards the basal region (4/5)   | Uniform (5/5)        | Absent (5/5)                        |
| b5-5    | Biased towards the basal region (5/5)   | Uniform (5/5)        | Absent (5/5)                        |
| b5-13   | Biased towards the basal region (5/5)   | Uniform (5/5)        | Absent (5/5)                        |
| b7-9    | Biased towards the apical region (5/7)  | Uniform (5/5)        | Absent (5/5)                        |
| b7-10   | Biased towards the apical region (8/10) | Uniform (5/5)        | Absent (5/5)                        |
| b7-14   | Biased towards the apical region (5/7)  | Uniform (4/5)        | Absent (5/5)                        |
| b8-3    | Scattered (5/5)                         | Uniform (5/5)        | Absent (5/5)                        |

|      |                 |               |              |
|------|-----------------|---------------|--------------|
| b8-4 | Scattered (5/5) | Uniform (5/5) | Absent (5/5) |
| b8-7 | Scattered (5/5) | Uniform (5/5) | Absent (4/5) |

*Figure 3*

| Line   | Leaf expression                        | Stem expression                              | Flower expression        | Silique expression | Embryo expression                   |
|--------|----------------------------------------|----------------------------------------------|--------------------------|--------------------|-------------------------------------|
| 1A-7   | Uniform (8/8)                          | Epidermis, cortex and vascular tissues (4/5) | Sepals and petals (4/5)  | Uniform (5/5)      | Root tip (5/5)                      |
| 1A-10  | Uniform (5/5)                          | Epidermis, cortex and vascular tissues (5/5) | Sepals and petals (5/5)  | Uniform (5/5)      | Root tip(5/5)                       |
| 1A-18  | Uniform (3/5)                          | Epidermis, cortex and vascular tissues (4/5) | Sepals and petals (7/10) | Uniform (4/7)      | Root tip(5/5)                       |
| 1B-3   | Uniform (5/5)                          | Epidermis, cortex and vascular tissues (4/5) | Sepals and petals (5/5)  | Uniform (5/5)      | Absent (6/6)                        |
| 1B-17  | Uniform (5/5)                          | Epidermis, cortex and vascular tissues (5/5) | Sepals and petals (5/5)  | Uniform (5/5)      | Absent (8/8)                        |
| 1B-18  | Uniform (4/5)                          | Epidermis, cortex and vascular tissues (4/5) | Sepals and petals (5/5)  | Uniform (5/5)      | Absent (4/6)                        |
| 2B-6   | Biased towards the basal region (7/10) | Cortex (5/5)                                 | Sepals and petals (5/5)  | Scattered (5/5)    | Absent (9/9)                        |
| 2B-24  | Biased towards the basal region (5/5)  | Cortex (4/5)                                 | Sepals and petals (5/5)  | Scattered (5/5)    | Absent (9/9)                        |
| 2B-32  | Biased towards the basal region (3/5)  | Cortex (5/5)                                 | Sepals and petals (5/5)  | Scattered (5/5)    | Absent (10/10)                      |
| 3B-14  | Uniform (5/5)                          | Cortex and vascular tissues (4/5)            | Sepals and petals (6/7)  | Uniform (5/5)      | Absent (8/8)                        |
| 3B-26  | Uniform (9/9)                          | Cortex and vascular tissues (3/5)            | Sepals and petals (3/8)  | Uniform (4/5)      | Absent (9/9)                        |
| 3B-29  | Uniform (4/6)                          | Cortex and vascular tissues (5/5)            | Sepals and petals (4/5)  | Uniform (5/5)      | Absent (9/9)                        |
| a1-8   | Uniform (5/5)                          | Epidermis, cortex and vascular tissues (5/5) | Sepals and petals (4/5)  | Uniform (5/5)      | Absent (7/7)                        |
| a1-9   | Uniform (4/6)                          | Epidermis, cortex and vascular tissues (5/5) | Sepals and petals (5/5)  | Uniform (5/5)      | Absent (10/10)                      |
| a1-11  | Uniform (10/10)                        | Epidermis, cortex and vascular tissues (5/5) | Sepals and petals (4/6)  | Uniform (4/5)      | Absent (2/8)                        |
| a6-1   | Scattered (4/5)                        | Cortex (5/5)                                 | Sepals (5/5)             | Uniform (5/5)      | Cotyledons and embryonic axis (5/6) |
| a6-6   | Scattered (6/7)                        | Cortex (5/5)                                 | Sepals (5/5)             | Uniform (5/5)      | Cotyledons and embryonic axis (6/6) |
| a6-13  | Scattered (5/7)                        | Cortex (5/5)                                 | Sepals (5/5)             | Uniform (5/5)      | Cotyledons and embryonic axis (5/6) |
| b1.1-1 | Uniform (4/5)                          | Cortex and vascular tissues (4/5)            | Sepals and petals (3/5)  | Uniform (5/5)      | Absent (5/5)                        |
| b1.1-8 | Uniform (5/5)                          | Cortex and vascular tissues (4/5)            | Sepals and petals (5/5)  | Uniform (5/5)      | Absent (4/5)                        |

|         |                  |                                              |                         |                 |                                     |
|---------|------------------|----------------------------------------------|-------------------------|-----------------|-------------------------------------|
| b1.1-11 | Uniform (5/5)    | Cortex and vascular tissues (4/5)            | Sepals and petals (5/5) | Uniform (4/5)   | Absent (5/5)                        |
| b2.1-6  | Uniform (5/5)    | Cortex and vascular tissues (5/5)            | Sepals and petals (4/5) | Uniform (5/5)   | Cotyledons and embryonic axis (5/5) |
| b2.1-8  | Uniform (5/5)    | Cortex and vascular tissues (5/5)            | Sepals and petals (5/5) | Uniform (5/5)   | Cotyledons and embryonic axis (4/5) |
| b2.1-14 | Uniform (4/5)    | Cortex and vascular tissues (4/5)            | Sepals and petals (4/5) | Uniform (4/5)   | Cotyledons and embryonic axis (4/5) |
| b2.3-2  | Uniform (5/5)    | Cortex and vascular tissues (5/5)            | Sepals and petals (4/5) | Scattered (4/5) | Absent (9/9)                        |
| b2.3-5  | Uniform (7/7)    | Cortex and vascular tissues (5/5)            | Sepals and petals (5/5) | Scattered (4/5) | Absent (10/10)                      |
| b2.3-7  | Uniform (5/5)    | Cortex and vascular tissues (4/5)            | Sepals and petals (3/5) | Scattered (5/5) | Absent (8/8)                        |
| b4.1-4  | Scattered (6/8)  | Absent (5/10)                                | Petals (4/5)            | Absent (3/8)    | Absent (7/8)                        |
| b4.1-14 | Scattered (8/10) | Absent (5/5)                                 | Petals (5/6)            | Absent (5/5)    | Absent (10/11)                      |
| b4.1-15 | Scattered (5/5)  | Absent (5/5)                                 | Petals (5/5)            | Absent (11/12)  | Absent (12/12)                      |
| b4.2-3  | Uniform (9/10)   | Cortex and vascular tissues (4/5)            | Absent (7/8)            | Scattered (5/6) | Absent (9/9)                        |
| b4.2-8  | Uniform (9/9)    | Cortex and vascular tissues (5/5)            | Absent (5/5)            | Scattered (4/5) | Absent (3/5)                        |
| b4.2-15 | Uniform (8/8)    | Cortex and vascular tissues (4/5)            | Absent (5/5)            | Scattered (5/5) | Absent (8/11)                       |
| b5-4    | Uniform (5/5)    | Epidermis, cortex and vascular tissues (3/5) | Sepals and petals (4/5) | Uniform (3/5)   | Absent (7/7)                        |
| b5-5    | Uniform (5/5)    | Epidermis, cortex and vascular tissues (5/5) | Sepals and petals (5/5) | Uniform (5/5)   | Absent (5/5)                        |
| b5-13   | Uniform (5/5)    | Epidermis, cortex and vascular tissues (5/5) | Sepals and petals (4/5) | Uniform (6/6)   | Absent (4/6)                        |
| b7-9    | Scattered (5/5)  | Cortex (4/5)                                 | Sepals and petals (5/5) | Scattered (4/5) | Cotyledons and embryonic axis (5/6) |
| b7-10   | Scattered (6/6)  | Cortex (5/5)                                 | Sepals and petals (5/5) | Scattered (4/5) | Cotyledons and embryonic axis (7/8) |
| b7-14   | Scattered (8/8)  | Cortex (5/5)                                 | Sepals and petals (5/5) | Scattered (4/5) | Cotyledons and embryonic axis (6/6) |
| b8-3    | Uniform (4/5)    | Epidermis, cortex and vascular tissues (5/5) | Sepals and petals (5/5) | Uniform (5/5)   | Root tip (6/8)                      |
| b8-4    | Uniform (4/5)    | Epidermis, cortex and vascular tissues (5/5) | Sepals and petals (4/5) | Uniform (5/5)   | Root tip (9/9)                      |
| b8-7    | Uniform (5/6)    | Epidermis, cortex and vascular tissues (5/5) | Sepals and petals (4/5) | Uniform (5/5)   | Root tip (4/5)                      |

*Figure 4*

| Line | 2.5 DAG expression                    | 4 DAG leaf expression   | 6 DAG leaf expression        |
|------|---------------------------------------|-------------------------|------------------------------|
| 1A-7 | Everywhere except middle region (5/5) | Most apical third (5/5) | Most apical two-thirds (5/5) |

|         |                                         |                                                                                                                    |                                          |
|---------|-----------------------------------------|--------------------------------------------------------------------------------------------------------------------|------------------------------------------|
| 1A-10   | Everywhere except middle region (5/5)   | Most apical third (5/5)                                                                                            | Most apical two-thirds (5/5)             |
| 1A-18   | ND                                      | ND                                                                                                                 | ND                                       |
| 1B-3    | Abaxial (5/5)                           | Abaxial (5/5)                                                                                                      | Abaxial (5/5)                            |
| 1B-17   | Abaxial (5/5)                           | Abaxial (5/5)                                                                                                      | Abaxial (5/5)                            |
| 1B-18   | ND                                      | ND                                                                                                                 | ND                                       |
| 2B-6    | Everywhere except middle region (5/5)   | Most apical half (5/5)                                                                                             | Throughout (5/5)                         |
| 2B-24   | Everywhere except middle region (5/5)   | Most apical half (5/5). Onset in tightly connected polygonal cells with non-autofluorescent plastids (5/5)         | Throughout (5/5)                         |
| 2B-32   | Everywhere except middle region (5/5)   | ND                                                                                                                 | ND                                       |
| 3B-14   | ND                                      | ND                                                                                                                 | ND                                       |
| 3B-26   | Everywhere except middle region (5/5)   | Most apical third (5/5)                                                                                            | Most apical two-thirds (5/5)             |
| 3B-29   | Everywhere except middle region (5/5)   | Most apical third (4/5). Onset in tightly connected polygonal cells with weakly autofluorescent plastids (5/5)     | Most apical two-thirds (5/5)             |
| a1-8    | Everywhere except middle region (5/5)   | Most apical third (5/5)                                                                                            | Most apical two-thirds (5/5)             |
| a1-9    | Everywhere except middle region (5/5)   | Most apical third (5/5)                                                                                            | Most apical two-thirds (5/5)             |
| a1-11   | ND                                      | ND                                                                                                                 | ND                                       |
| a6-1    | Everywhere except middle region (8/10)  | Most apical half (5/5)                                                                                             | Throughout (6/6)                         |
| a6-6    | ND                                      | Most apical half (5/8)                                                                                             | ND                                       |
| a6-13   | Everywhere except middle region (10/12) | Most apical half (4/5)                                                                                             | Throughout (6/6)                         |
| b1.1-1  | ND                                      | ND                                                                                                                 | ND                                       |
| b1.1-8  | Everywhere except middle region (5/5)   | Most apical third (5/5)                                                                                            | Most apical two-thirds (4/5)             |
| b1.1-11 | Everywhere except middle region (4/5)   | Most apical third (5/5)                                                                                            | Most apical two-thirds (5/5)             |
| b2.1-6  | Everywhere except middle region (5/5)   | Most apical half (5/5)                                                                                             | Throughout (5/5)                         |
| b2.1-8  | Everywhere except middle region (5/5)   | Most apical half (5/5)                                                                                             | Throughout (5/5)                         |
| b2.1-14 | ND                                      | ND                                                                                                                 | ND                                       |
| b2.3-2  | Absent (4/5)                            | Tip (5/5)                                                                                                          | Expression in the most apical half (5/5) |
| b2.3-5  | ND                                      | ND                                                                                                                 | ND                                       |
| b2.3-7  | Absent (4/5)                            | Tip (5/5). Onset in round cells separated by intercellular spaces and with strongly autofluorescent plastids (5/5) | Expression in the most apical half (5/5) |
| b4.1-4  | Everywhere except middle region (4/5)   | Most apical half (5/5)                                                                                             | Throughout (5/5)                         |
| b4.1-14 | ND                                      | ND                                                                                                                 | ND                                       |
| b4.1-15 | Everywhere except middle region (4/5)   | Most apical half (5/5)                                                                                             | Throughout (5/5)                         |
| b4.2-3  | Everywhere except middle region (5/5)   | Most apical third (5/5)                                                                                            | Most apical two-thirds (5/5)             |
| b4.2-8  | Everywhere except middle region (5/5)   | Most apical third (5/5)                                                                                            | Most apical two-thirds (5/5)             |
| b4.2-15 | ND                                      | ND                                                                                                                 | ND                                       |
| b5-4    | Everywhere except middle region (5/5)   | Most apical half (5/5)                                                                                             | Throughout (5/5)                         |
| b5-5    | ND                                      | ND                                                                                                                 | ND                                       |
| b5-13   | Everywhere except middle region (5/5)   | Most apical half (5/5)                                                                                             | Throughout (5/5)                         |
| b7-9    | Adaxial (10/10)                         | Adaxial (6/6)                                                                                                      | Adaxial (7/7)                            |
| b7-10   | Adaxial (8/10)                          | Adaxial (9/9)                                                                                                      | Adaxial (7/7)                            |
| b7-14   | ND                                      | Adaxial (8/8)                                                                                                      | ND                                       |
| b8-3    | Epidermal (5/5)                         | Epidermal (5/5)                                                                                                    | Epidermal (5/5)                          |

b8-4 ND  
b8-7 Epidermal (5/5)

ND  
Epidermal (5/5)

ND  
Epidermal (5/5)

*Figure 5*

Line Colocalization with *Athb8*

1A-7 Absent (5/5)  
1A-10 Absent (5/5)  
1A-18 ND  
1B-3 Absent (5/5)  
1B-17 Absent (5/5)  
1B-18 ND  
2B-6 Absent (5/5)  
2B-24 Absent (5/5)  
2B-32 ND  
3B-14 ND  
3B-26 Absent (5/5)  
3B-29 Absent (5/5)  
a1-8 Absent (5/5)  
a1-9 Absent (5/5)  
a1-11 ND  
a6-1 Absent (5/5)  
a6-6 ND  
a6-13 Absent (8/8)  
b1.1-1 ND  
b1.1-8 Absent (5/5)  
b1.1-11 Absent (5/5)  
b2.1-6 Absent (5/5)  
b2.1-8 Absent (5/5)  
b2.1-14 ND  
b2.3-2 Absent (5/5)  
b2.3-5 ND  
b2.3-7 Absent (5/5)  
b4.1-4 Absent (5/5)  
b4.1-14 ND  
b4.1-15 Absent (5/5)  
b4.2-3 Absent (5/5)  
b4.2-8 Absent (5/5)  
b4.2-15 ND  
b5-4 Absent (5/5)  
b5-5 ND  
b5-13 Absent (5/5)  
b7-9 Absent (6/6)  
b7-10 ND  
b7-14 Absent(12/12)  
b8-3 Absent (5/5)

b8-4 ND  
b8-7 Absent (5/5)

*Figure 6*

| Line    | Epidermal expression |
|---------|----------------------|
| 1A-7    | Guard cells (5/5)    |
| 1A-10   | Guard cells (5/5)    |
| 1A-18   | ND                   |
| 1B-3    | Guard cells (5/5)    |
| 1B-17   | Guard cells (5/5)    |
| 1B-18   | ND                   |
| 2B-6    | Guard cells (5/5)    |
| 2B-24   | Guard cells (5/5)    |
| 2B-32   | ND                   |
| 3B-14   | ND                   |
| 3B-26   | Guard cells (5/5)    |
| 3B-29   | Guard cells (5/5)    |
| a1-8    | Guard cells (5/5)    |
| a1-9    | Guard cells (5/5)    |
| a1-11   | ND                   |
| a6-1    | Absent (5/5)         |
| a6-6    | Absent (5/5)         |
| a6-13   | Absent (5/5)         |
| b1.1-1  | Absent (5/5)         |
| b1.1-8  | Absent (5/5)         |
| b1.1-11 | Absent (3/5)         |
| b2.1-6  | Guard cells (5/5)    |
| b2.1-8  | Guard cells (3/5)    |
| b2.1-14 | ND                   |
| b2.3-2  | Guard cells (5/5)    |
| b2.3-5  | ND                   |
| b2.3-7  | Guard cells (5/5)    |
| b4.1-4  | Guard cells (5/5)    |
| b4.1-14 | ND                   |
| b4.1-15 | Guard cells (5/5)    |
| b4.2-3  | Guard cells (5/5)    |
| b4.2-8  | Guard cells (5/5)    |
| b4.2-15 | ND                   |
| b5-4    | Guard cells (5/5)    |
| b5-5    | ND                   |
| b5-13   | Guard cells (5/5)    |
| b7-9    | Guard cells (5/5)    |
| b7-10   | Guard cells (5/5)    |
| b7-14   | Guard cells (5/5)    |
| b8-3    | Guard cells (5/5)    |

b8-4 ND  
 b8-7 Guard cells (5/5)

*Figure 7*

| Line    | Dark expression                 | Blue induction                  | Red induction                   | Far red induction               |
|---------|---------------------------------|---------------------------------|---------------------------------|---------------------------------|
| 1A-7    | Cotyledons and hypocotyls (5/5) |
| 1A-10   | Cotyledons and hypocotyls (5/5) | Cotyledons and hypocotyls (5/5) | Cotyledons and hypocotyls (4/5) | Cotyledons and hypocotyls (5/5) |
| 1A-18   | Cotyledons and hypocotyls (5/5) | Cotyledons and hypocotyls (4/5) | Cotyledons and hypocotyls (4/5) | Cotyledons and hypocotyls (3/5) |
| 1B-3    | Cotyledons and hypocotyls (4/5) | Cotyledons (5/5)                | Cotyledons (5/5)                | Cotyledons (5/5)                |
| 1B-17   | Cotyledons and hypocotyls (3/5) | Cotyledons (5/5)                | Cotyledons (5/5)                | Cotyledons (5/5)                |
| 1B-18   | Cotyledons and hypocotyls (5/5) | Cotyledons (5/5)                | Cotyledons (5/5)                | Cotyledons (5/5)                |
| 2B-6    | Cotyledons and hypocotyls (4/5) | Cotyledons (5/5)                | Cotyledons (4/5)                | Cotyledons (5/5)                |
| 2B-24   | Cotyledons and hypocotyls (4/5) | Cotyledons (5/5)                | Cotyledons (4/5)                | Cotyledons (4/5)                |
| 2B-32   | Cotyledons and hypocotyls (4/5) | Cotyledons (5/5)                | Cotyledons (5/5)                | Cotyledons (5/5)                |
| 3B-14   | Cotyledons and hypocotyls (5/5) | Cotyledons and hypocotyls (5/5) | Cotyledons (5/5)                | Cotyledons and hypocotyls (5/5) |
| 3B-26   | Cotyledons and hypocotyls (4/5) | Cotyledons and hypocotyls (5/5) | Cotyledons (4/5)                | Cotyledons and hypocotyls (5/5) |
| 3B-29   | Cotyledons and hypocotyls (5/5) | Cotyledons and hypocotyls (5/5) | Cotyledons (5/5)                | Cotyledons and hypocotyls (5/5) |
| a1-8    | Cotyledons and hypocotyls (4/5) | Cotyledons (5/5)                | Cotyledons (4/5)                | Cotyledons (5/5)                |
| a1-9    | Cotyledons and hypocotyls (4/5) | Cotyledons (5/5)                | Cotyledons (5/5)                | Cotyledons (5/5)                |
| a1-11   | Cotyledons and hypocotyls (3/5) | Cotyledons (5/5)                | Cotyledons (4/5)                | Cotyledons (5/5)                |
| a6-1    | Cotyledons and hypocotyls (5/5) | Cotyledons and hypocotyls (5/5) | Cotyledons (3/5)                | Cotyledons and hypocotyls (5/5) |
| a6-6    | Cotyledons and hypocotyls (5/5) | Cotyledons and hypocotyls (5/5) | Cotyledons (4/5)                | Cotyledons and hypocotyls (5/5) |
| a6-13   | Cotyledons and hypocotyls (5/5) | Cotyledons and hypocotyls (5/5) | Cotyledons (5/5)                | Cotyledons and hypocotyls (5/5) |
| b1.1-1  | Cotyledons and hypocotyls (5/5) | Cotyledons (4/5)                | Cotyledons (4/5)                | Cotyledons (5/5)                |
| b1.1-8  | Cotyledons and hypocotyls (4/5) | Cotyledons (4/5)                | Cotyledons (5/5)                | Cotyledons (5/5)                |
| b1.1-11 | Cotyledons and hypocotyls (5/5) | Cotyledons (4/5)                | Cotyledons (5/5)                | Cotyledons (4/5)                |
| b2.1-6  | Cotyledons and hypocotyls (4/5) | Cotyledons and hypocotyls (5/5) | Cotyledons and hypocotyls (5/5) | Cotyledons and hypocotyls (5/5) |
| b2.1-8  | Cotyledons and hypocotyls (4/5) | Cotyledons and hypocotyls (5/5) | Cotyledons and hypocotyls (5/5) | Cotyledons and hypocotyls (5/5) |
| b2.1-14 | Cotyledons and hypocotyls (5/5) | Cotyledons and hypocotyls (4/5) | Cotyledons and hypocotyls (4/5) | Cotyledons and hypocotyls (5/5) |
| b2.3-2  | Cotyledons and hypocotyls (5/5) | Cotyledons (5/5)                | Cotyledons (3/5)                | Cotyledons (5/5)                |
| b2.3-5  | Cotyledons and hypocotyls (5/5) | Cotyledons (5/5)                | Cotyledons (4/5)                | Cotyledons (4/5)                |
| b2.3-7  | Cotyledons and hypocotyls (4/5) | Cotyledons (5/5)                | Cotyledons (4/5)                | Cotyledons (5/5)                |
| b4.1-4  | Cotyledons and hypocotyls (4/5) | Cotyledons (5/5)                | Cotyledons (4/5)                | Cotyledons (5/5)                |
| b4.1-14 | Cotyledons and hypocotyls (4/5) | Cotyledons (4/5)                | Cotyledons (4/5)                | Cotyledons (4/5)                |
| b4.1-15 | Cotyledons and hypocotyls (4/5) | Cotyledons (5/5)                | Cotyledons (5/5)                | Cotyledons (4/5)                |
| b4.2-3  | Cotyledons and hypocotyls (5/5) | Cotyledons and hypocotyls (5/5) | Cotyledons and hypocotyls (4/5) | Cotyledons and hypocotyls (5/5) |
| b4.2-8  | Cotyledons and hypocotyls (5/5) |
| b4.2-15 | Cotyledons and hypocotyls(5/5)  | Cotyledons and hypocotyls (5/5) | Cotyledons and hypocotyls (5/5) | Cotyledons and hypocotyls (5/5) |
| b5-4    | Cotyledons and hypocotyls (5/5) | Cotyledons and hypocotyls (5/5) | Cotyledons (5/5)                | Cotyledons and hypocotyls (5/5) |
| b5-5    | Cotyledons and hypocotyls (4/5) | Cotyledons and hypocotyls (5/5) | Cotyledons (5/5)                | Cotyledons and hypocotyls (5/5) |
| b5-13   | Cotyledons and hypocotyls (5/5) | Cotyledons and hypocotyls (5/5) | Cotyledons (5/5)                | Cotyledons and hypocotyls (5/5) |
| b7-9    | Cotyledons (5/5)                | Cotyledons (5/5)                | Absent (2/5)                    | Cotyledons (5/5)                |
| b7-10   | Cotyledons (5/5)                | Cotyledons (5/5)                | Absent (5/5)                    | Cotyledons (5/5)                |
| b7-14   | Cotyledons (4/5)                | Cotyledons (4/5)                | Absent (4/5)                    | Cotyledons (4/5)                |
| b8-3    | Cotyledons and hypocotyls(5/5)  | Cotyledons and hypocotyls (5/5) | Cotyledons (4/5)                | Cotyledons and hypocotyls (5/5) |



b8-4  
b8-7

Cotyledons and hypocotyls(4/5)  
Cotyledons and hypocotyls(5/5)

Cotyledons and hypocotyls (5/5)  
Cotyledons and hypocotyls (5/5)

Cotyledons (4/5)  
Cotyledons (4/5)

Cotyledons and hypocotyls (5/5)  
Cotyledons and hypocotyls (5/5)
